# Supplementary material
Source: PubMed Central journal article supplement (PMC2847526)
Supplement: E09-11-0937_1.pdf [file E09-11-0937_1.pdf]

# **Growth factor *erv1*-like Modulates Drp1 to Preserve Mitochondrial Dynamics and Pluripotency in Mouse Embryonic Stem Cells**

Lance R. Todd,<sup>\*</sup> Matthew N. Damin,<sup>\*</sup> Rohini Gomathinayagam,<sup>\*</sup> Sarah R. Horn,<sup>‡</sup> Anthony R. Means,<sup>‡</sup> and Uma Sankar<sup>\*#§</sup>

<sup>\*</sup>James Graham Brown Cancer Center and Owensboro Cancer Research Program,

<sup>#</sup>Department of Pharmacology and Toxicology, University of Louisville, Owensboro, KY 42303; <sup>‡</sup>Department of Pharmacology and Cancer Biology, Duke University Medical Center, Durham, NC 27707.

<sup>§</sup>Corresponding author: Address correspondence to Uma Sankar, Ph.D., Assistant Professor and Associate Scientist, Department of Pharmacology and Toxicology, James Graham Brown Cancer Center and the Owensboro Cancer Research Program, University of Louisville, Suite 201 Mitchell Memorial Cancer Center, 1020 Breckenridge Street, Owensboro, KY 42303, USA. Tel: 270-691-5957, Fax: 270-685-5684, Email: [uma.sankar@louisville.edu](mailto:uma.sankar@louisville.edu)

## **Supplementary Information:**

**Supplementary Figure 1. Depletion of Gfer results in significantly reduced marker gene expression in all three germ layers.** Average (n=3), normalized (to actin) mRNA levels of Pax3 and FGF5 (markers of neuroectoderm), Gata4 and Sox17 (markers of endoderm), and Goosecoid and Brachury (markers of mesoderm) in day 6 EBs formed by indicated genotypes; Error bars represent  $\pm$  SD; \*  $p=0.00004$ .

**Supplementary Figure 2. Lenti-GFP-shRNA-virus infection does not affect mitochondrial  $\Delta\Psi_m$  of ESCs.** Representative histogram (n=6) depicting TMRE fluorescence in lacZ-KD (red) and WT ESCs (green) at 72 hours post lentivirus infection.

**Supplementary Figure 3. Gfer KD initiates degeneration and autophagy of mitochondria in ESCs.** (A) Digital TEM images depicting ultrastructural details in Gfer-1 KD ESCs. Scale bars are 5  $\mu$ M at 2650X and 1 $\mu$ M at 7100X and 25000X magnifications. (B) Representative immunoblot (n=3) analyses of autophagy associated proteins Beclin-1, Atg5/12 and LC3b in indicated ESC genotypes. Gfer and actin levels are also shown.

**Supplementary Figure 4. Inhibition of mitochondrial ETC complex I triggers mitophagy in WT-ESCs and Gfer overexpression protects ESCs from rotenone toxicity.** (A) Representative histograms (n=3) showing % of apoptotic cells, measured by Annexin V/7-AAD reactivity in ESCs, at 24 h following treatment with DMSO (vehicle) or 10  $\mu$ M rotenone. (B) Digital TEM images depicting ultrastructural details in ESCs at 24 h following treatment with DMSO or 10  $\mu$ M rotenone. Images are presented as 2650X (scale 5  $\mu$ m), 5600X and 25000X magnifications (scale 1  $\mu$ m). (C) Percentage of apoptotic cells, measured by Annexin V/7-AAD reactivity in indicated ESCs genotypes, at 24 h following treatment with DMSO or 10  $\mu$ M rotenone (n=3).

**Supplementary Figure 5. Gfer does not modulate fusion GTPases and inhibition of Drp1 does not alter pluripotency marker expression in lacZ-KD ESCs.** (A) Representative immunoblots (n=2) depicting OPA1, Mfn1, Mfn2 and actin protein levels in Control, Gfer-KD and MSCV-Gfer ESCs. (B) Digital ApoTome (optical section) images (630X magnification) depicting Nanog, Oct-4, and SSEA1 expression (all in Red; Dapi in blue) in lacZ-KD ESCs and lacZ-KD ESCs expressing Drp1<sup>DN</sup>.

**Supplementary Table 1: Sequence information of primers used in qRT-PCR.**

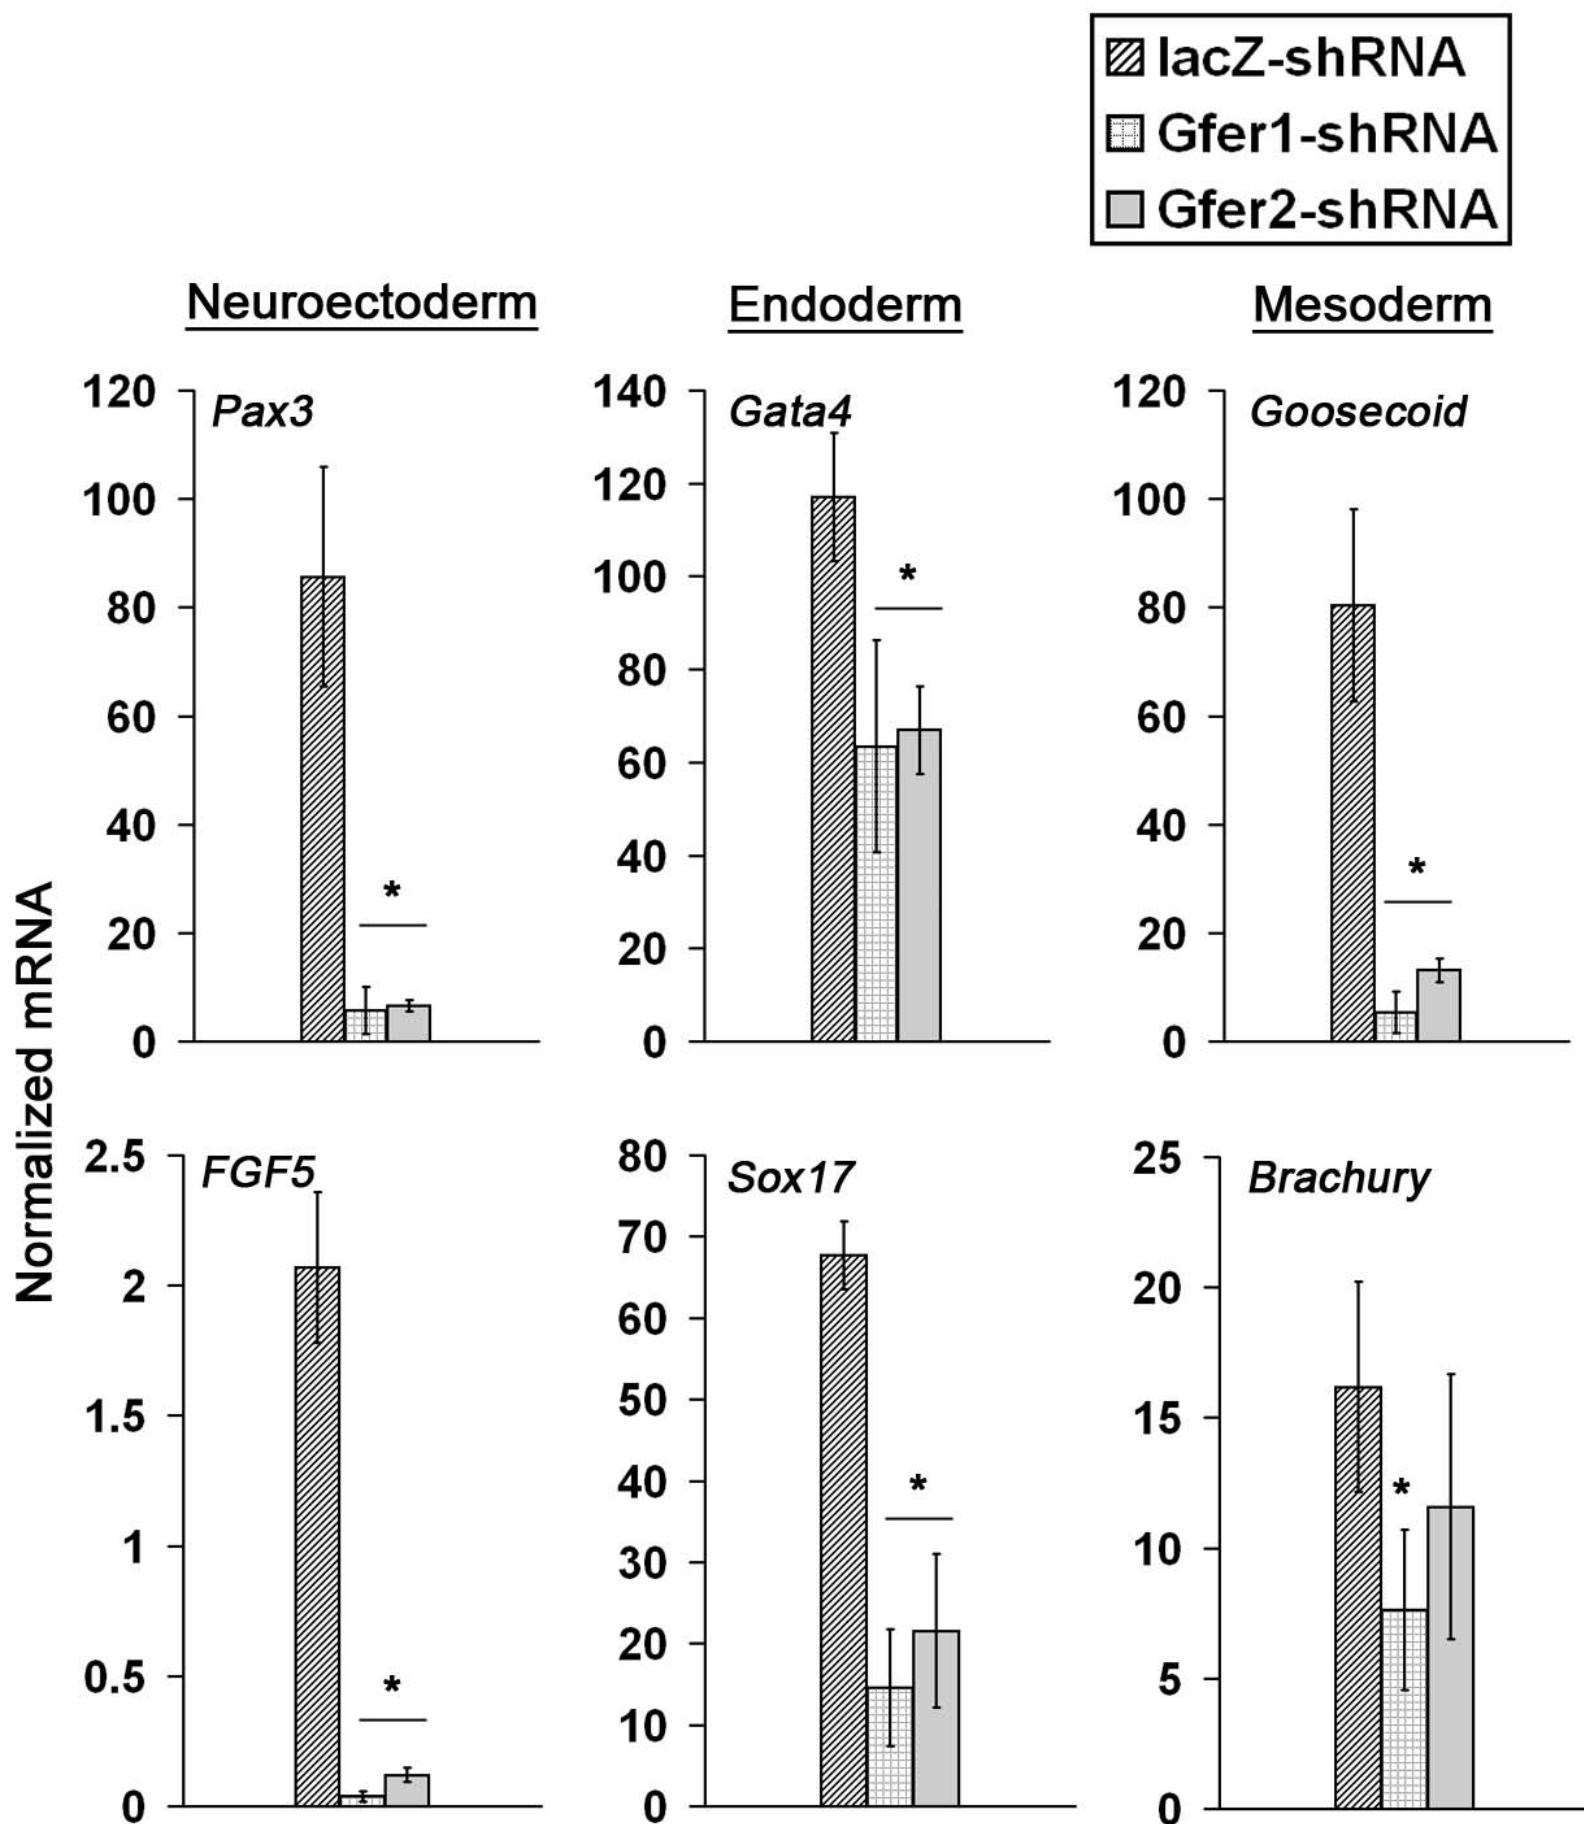

## Supplementary Figure 2

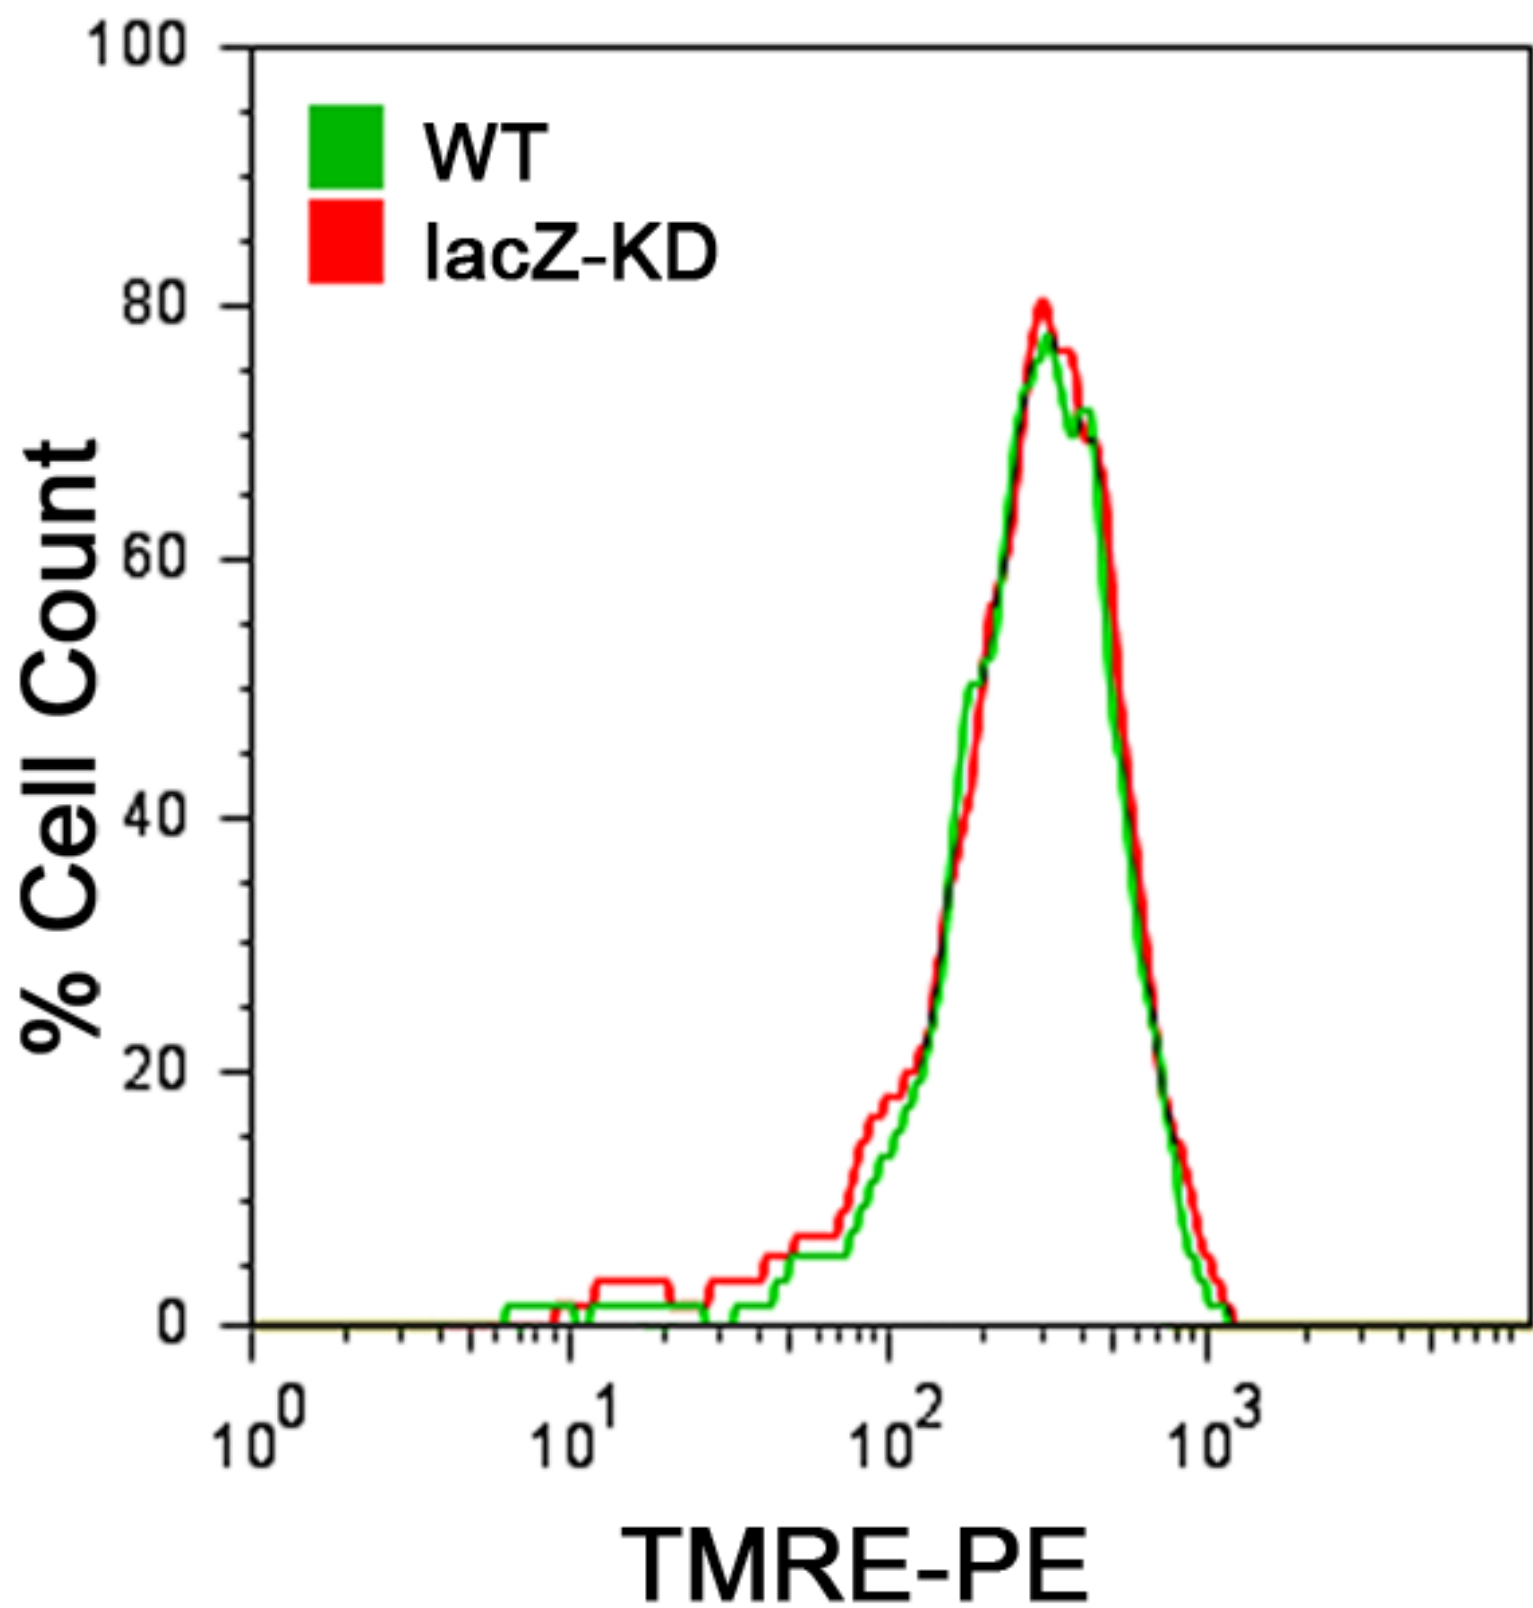

**A**

Gfer1-KD-2650X

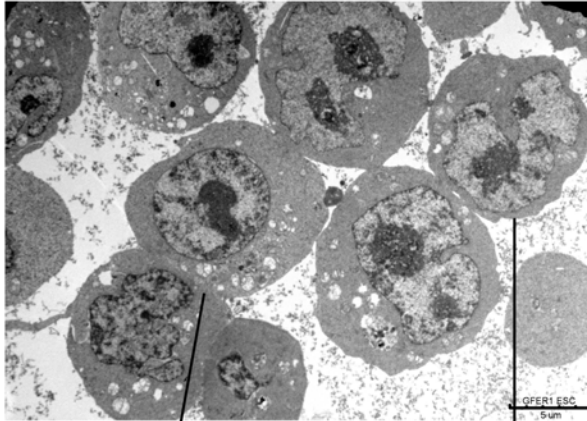

7100X

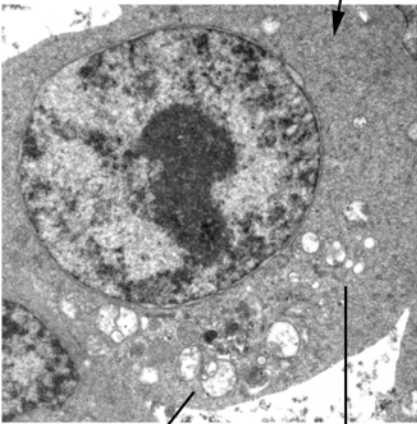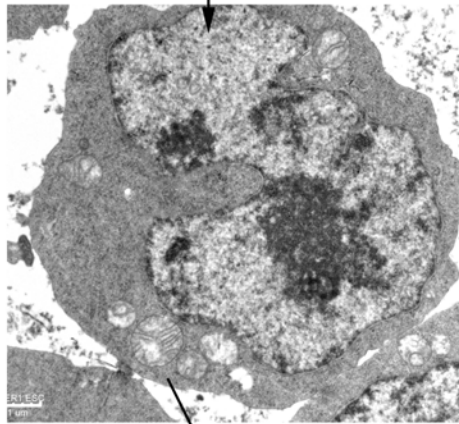

25000X

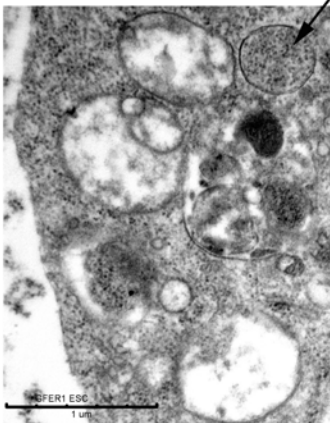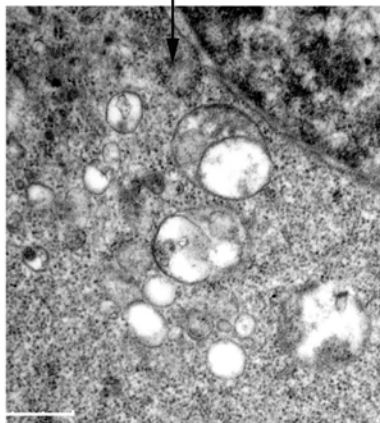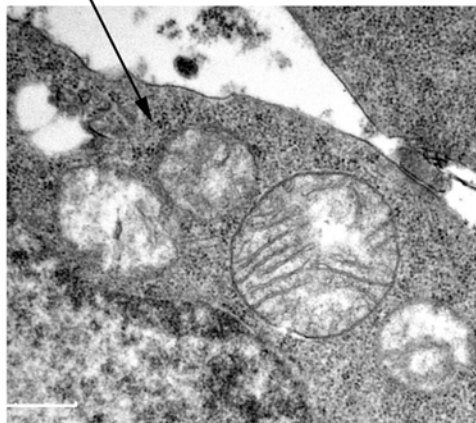**B**

Supplementary Figure 3

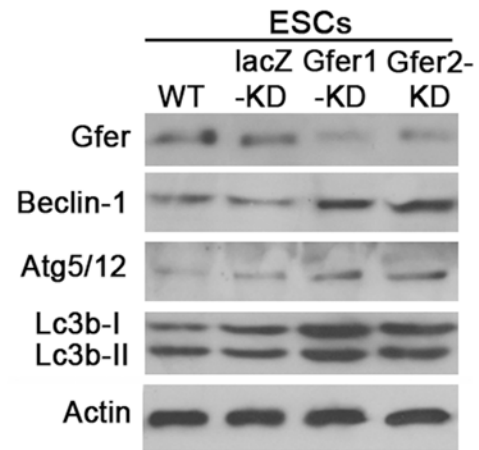

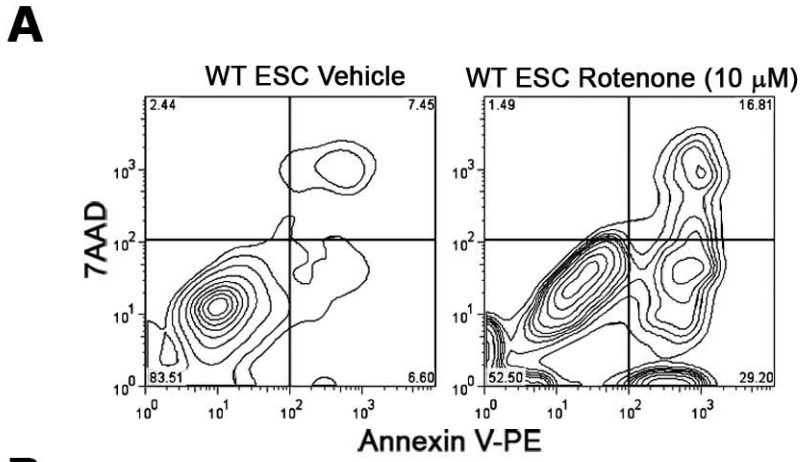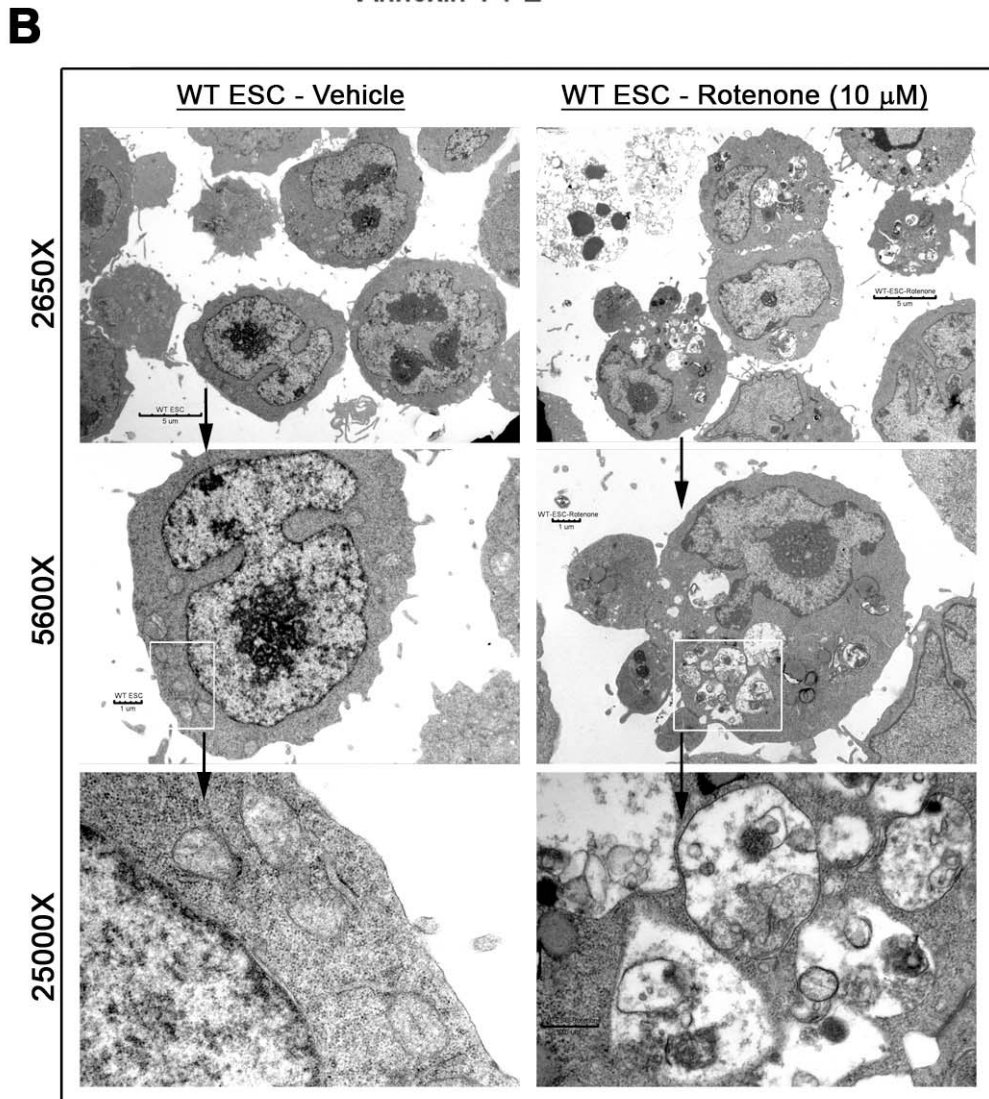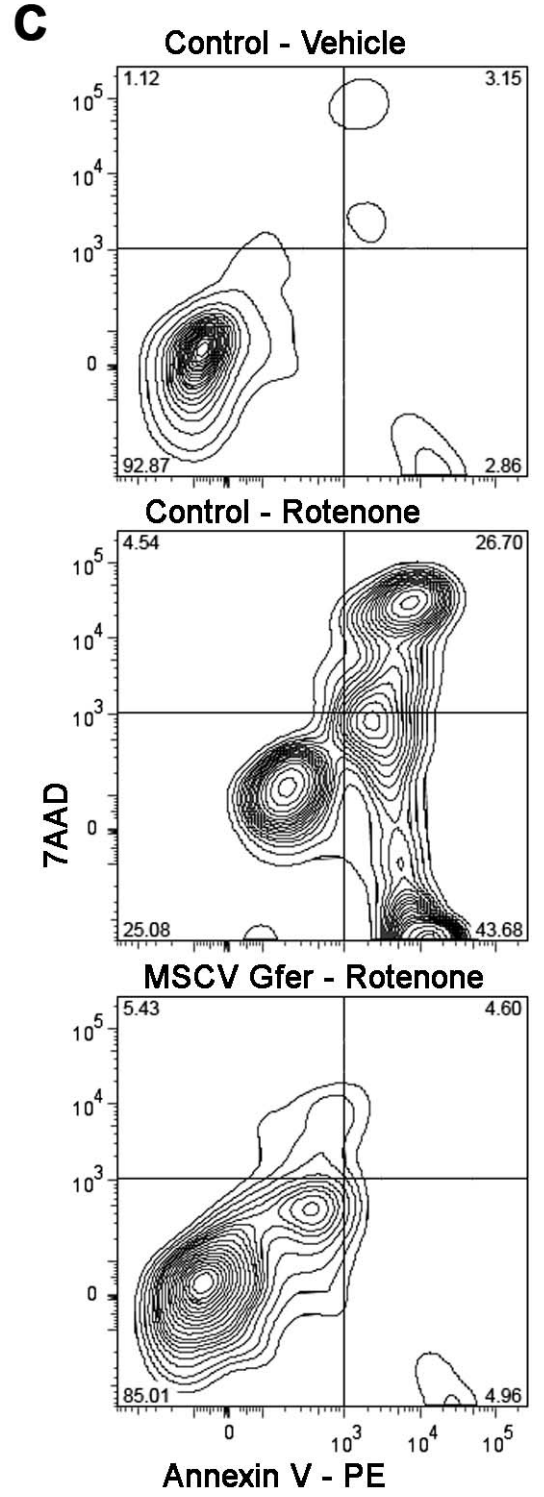

**A**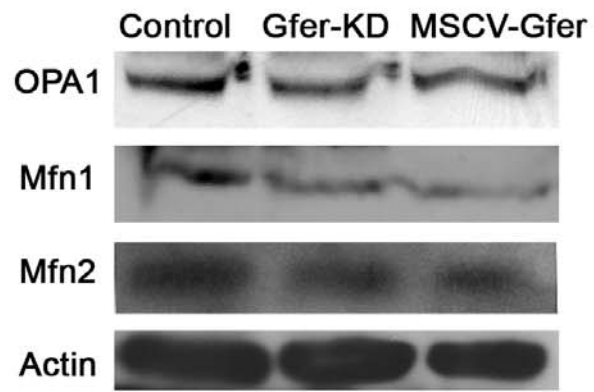**B**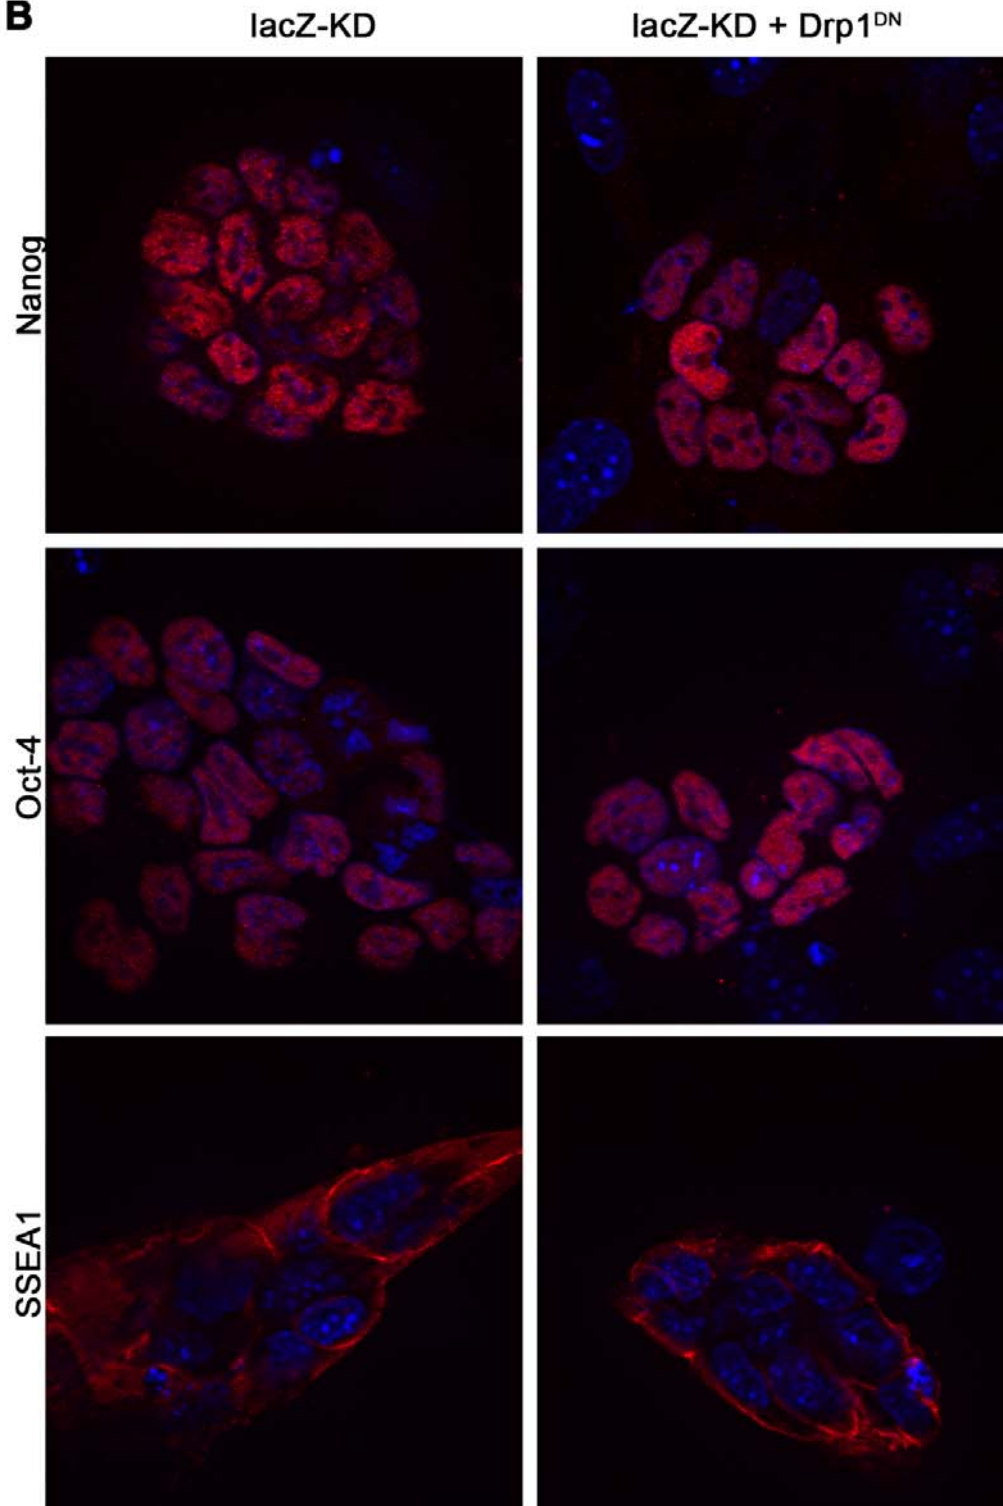

**Supplementary Table 1: Quantitative RT-PCR Primer Sequences**

| <b>Gene</b> | <b>qRT-PCR Primer (5'-3')</b>   |
|-------------|---------------------------------|
| Actin-F     | GGG AAATCG TGC GTG ACA TC       |
| Actin-R     | CCA AGA AGG AAG GCT GGA AAA G   |
| Gfer-F1     | TCTAGCCTGGTTCTATGGGCAACA        |
| Gfer-R1     | TCAGATGACAGCGCCTCTGAAACT        |
| Brachury-F  | CTC TAA TGT CCT CCC TTG TTG CC  |
| Brachury-R  | TGC AGA TTG TCT TTG GCT ACT TTG |
| FGF5-F      | CTG TAT GGA CCC ACA GGG AGT AAC |
| FGF5-R      | ATT AAG CTC CTG GGT CGC AAG     |
| GATA-F      | TTC CTG CTC GGA CTT GGG AC      |
| GATA-R      | TTC CCA GGC AGG TGG AGA ATA AG  |
| Pax3-F      | ATA AGC CCA GGA CAC AGA GTT GTG |
| Pax3-R      | GTC TAG TCT GTG GAG GCC GGA AAC |
| Sox17-F     | AAG AAA CCC TAA ACA CAA ACA GCG |
| Sox17-R     | TTT GTG GGA AGT GGG ATC AAG AC  |
| Goosecoid-F | AAA CGC CGA GAA GTG GAA CAA G   |
| Goosecoid-R | AAG GCA GGG TGT GTG CAA GTA     |
